# Supplementary material
Source: PubMed Central journal article supplement (PMC1450136)

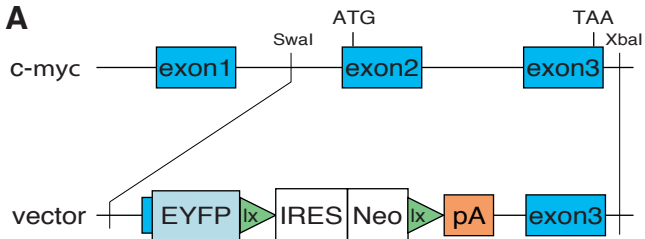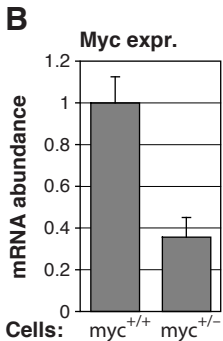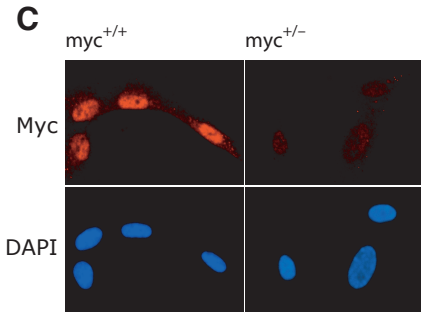

Supplement: pnas_0600069103_1.pdf [file pnas_0600069103_1.pdf]

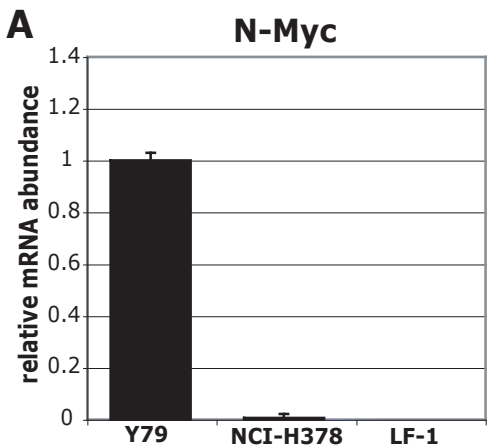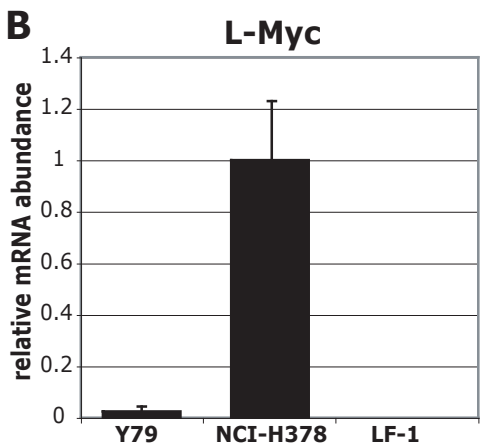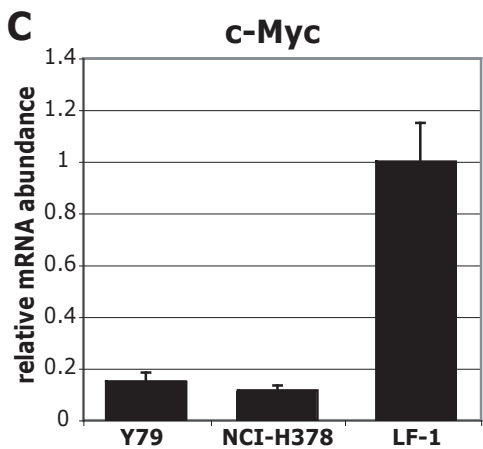

Supplement: pnas_0600069103_2.pdf [file pnas_0600069103_2.pdf]

$myc^{+/+}$

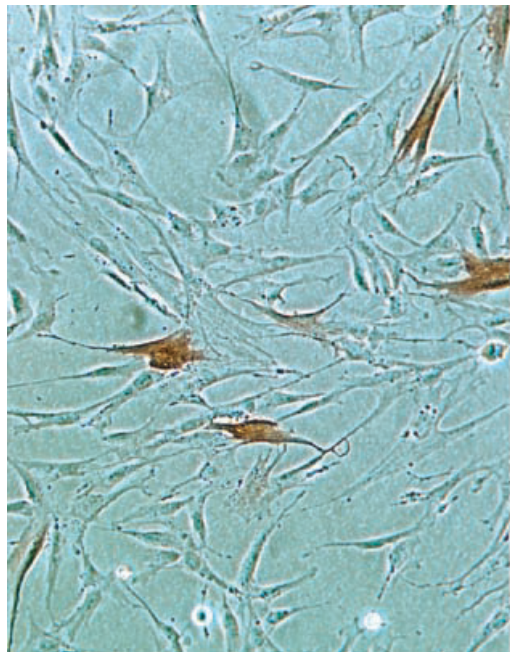

$myc^{+/-}$

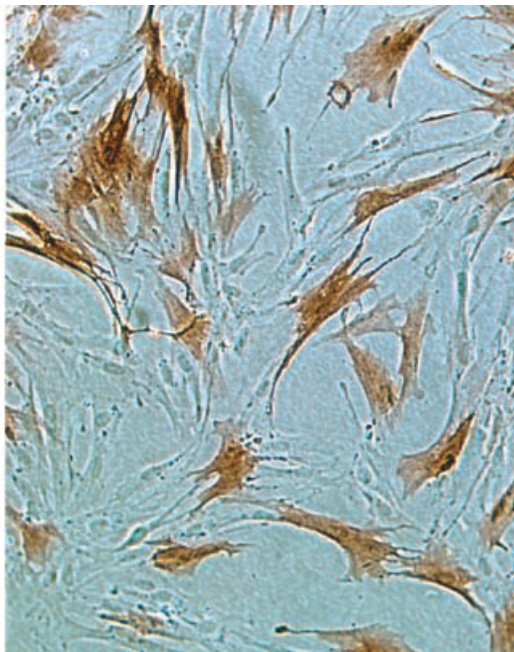

Supplement: pnas_0600069103_3.pdf [file pnas_0600069103_3.pdf]

**A**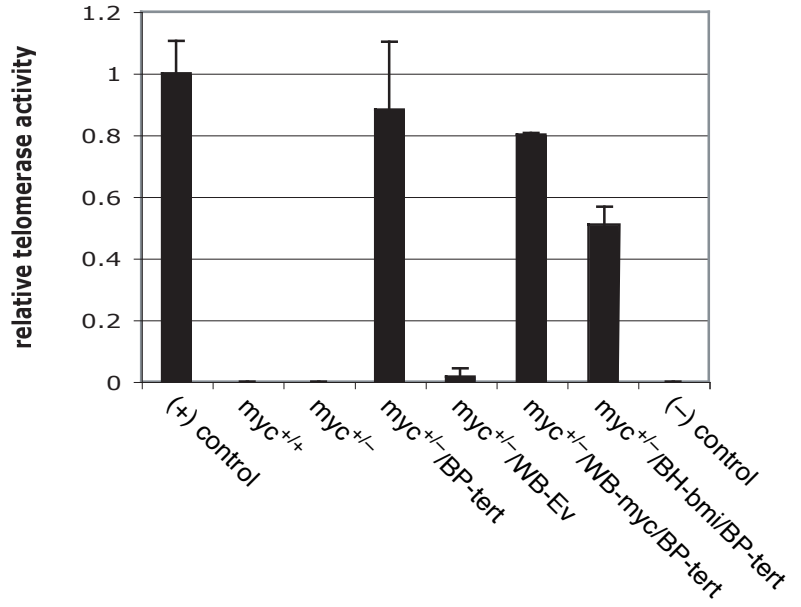**KEY:**

BP: pBABE-puro  
 WB: pWZL-blast  
 BH: pBABE-hygro  
 EV: empty vector

**B**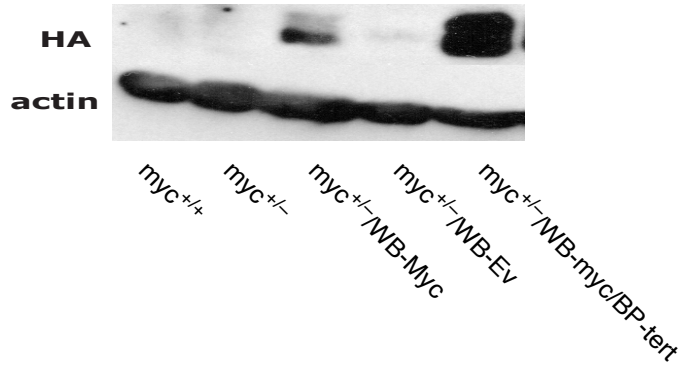**C**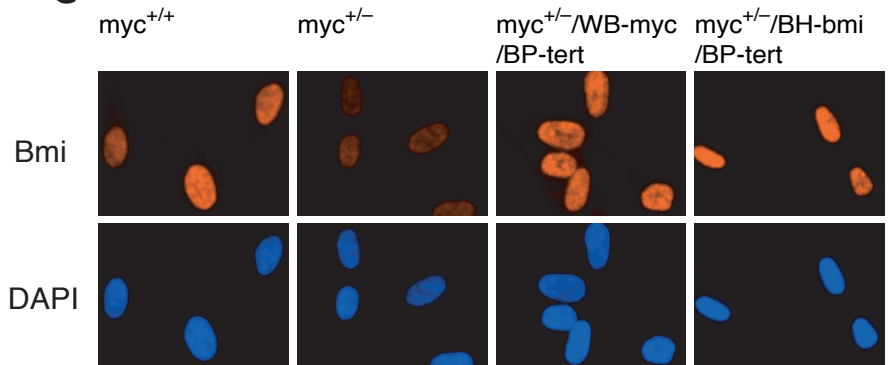

Supplement: pnas_0600069103_4.pdf [file pnas_0600069103_4.pdf]

# A

## p16 IHC

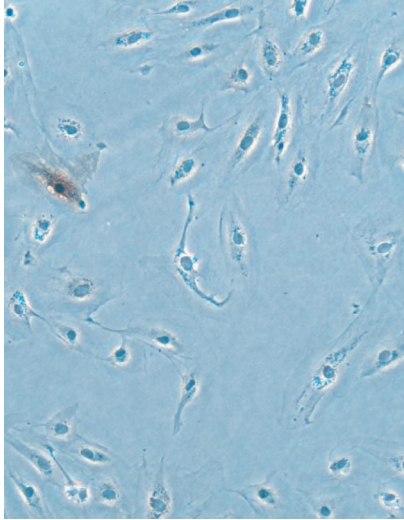

Empty vect.

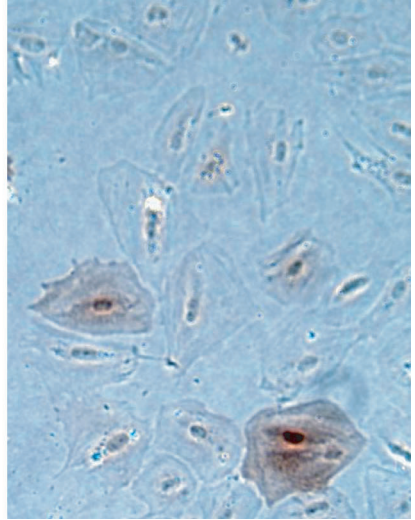

Myc shRNA

# B

## p16 IHC

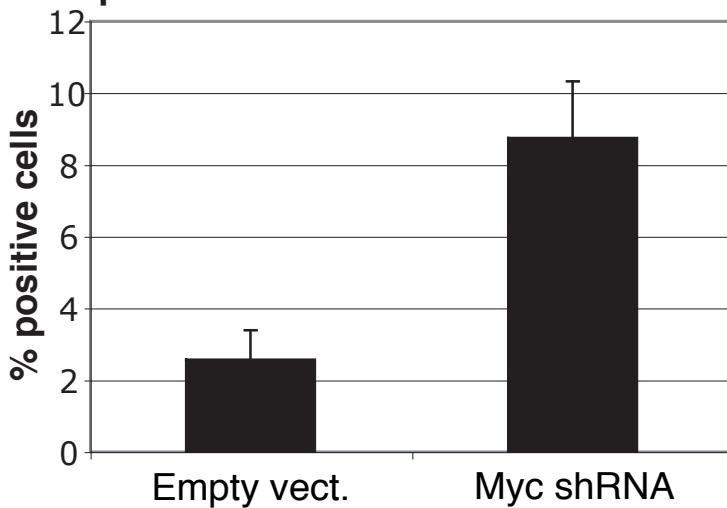

Supplement: pnas_0600069103_5.pdf [file pnas_0600069103_5.pdf]

**A**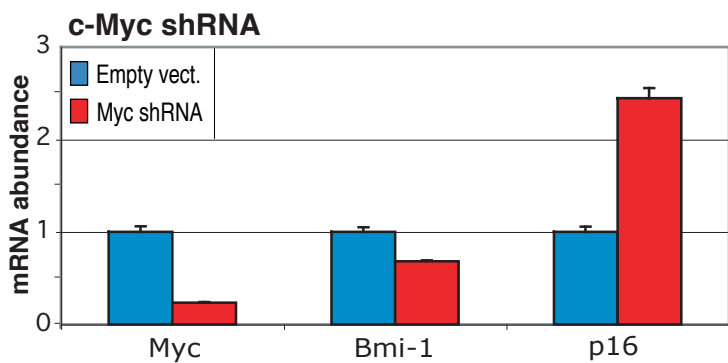**B**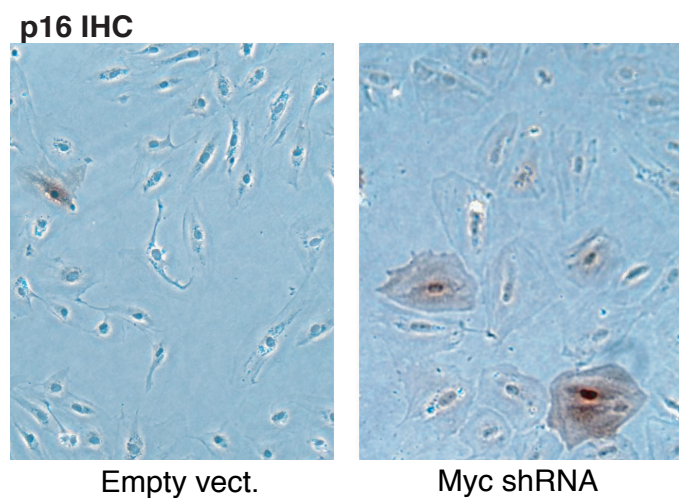**C**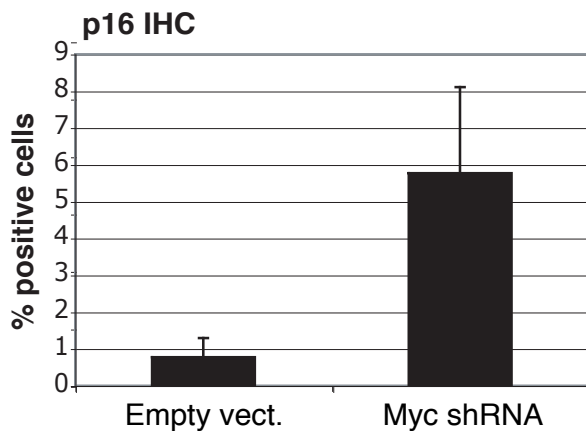

Supplement: pnas_0600069103_6.pdf [file pnas_0600069103_6.pdf]

**A**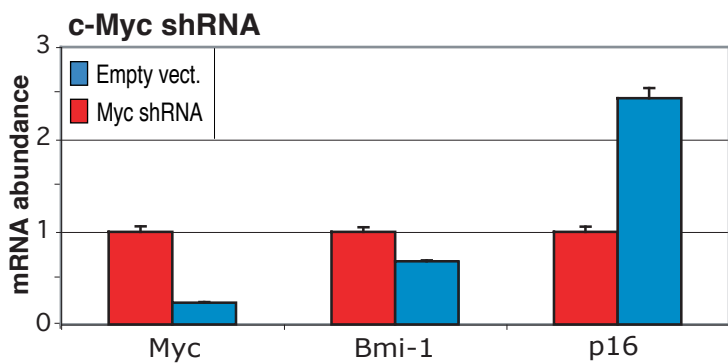**B****p16 IHC**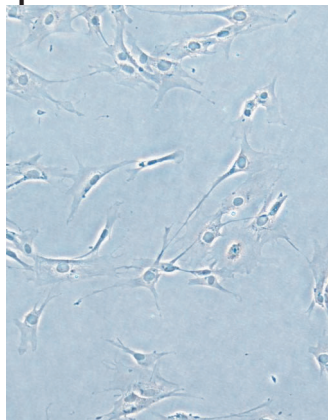

Empty vect.

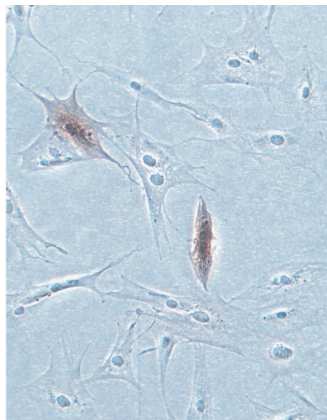

Myc shRNA

**C**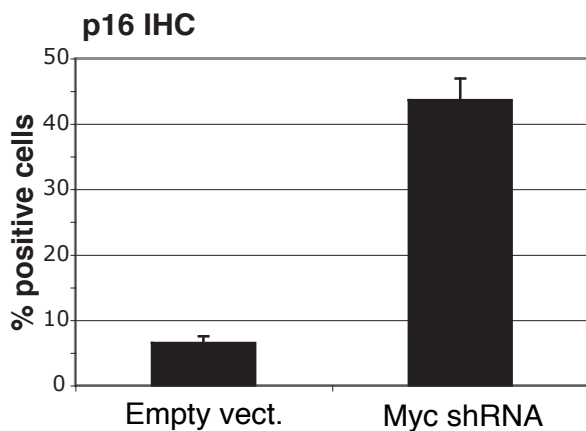

Supplement: pnas_0600069103_7.pdf [file pnas_0600069103_7.pdf]

**A**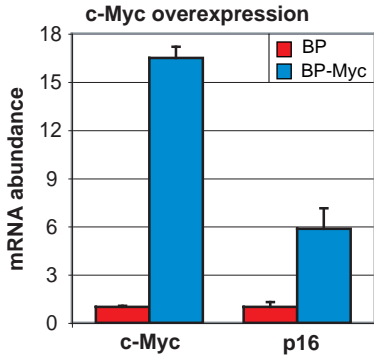**B**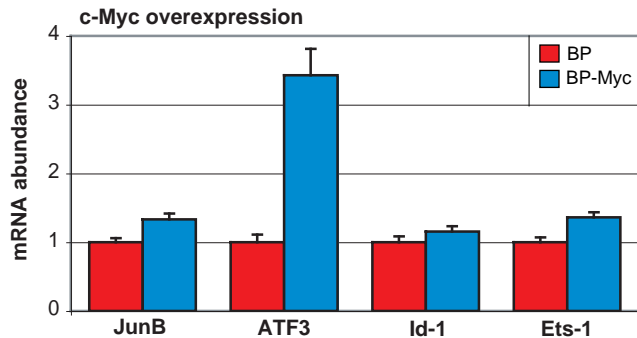

Supplement: pnas_0600069103_8.pdf [file pnas_0600069103_8.pdf]
